# Supplementary material for: RNA-Seq Uncovers SNPs and Alternative Splicing Events in Asian Lotus (Nelumbo nucifera)
Source: PubMed Central journal article supplement (PMC4416007; doi:10.1371/journal.pone.0125702), 2015-04-30
Supplement: pone.0125702.s001.pdf [file pone.0125702.s001.pdf]

S1 Table. Primer information for SNP and AS validation.

| Gene         | Validation | Forward primer (5'→3') | Reverse primer (5'→3') |
|--------------|------------|------------------------|------------------------|
| RSP31        | SNP        | GAAGAGGTGGCTACGGGAGG   | CGTGGGCATTGAGTTTGAGG   |
| H4           | SNP        | AAAATCATCACAGGCGAAAT   | AGAACCATAGCAGGAAGCAC   |
| Y4372        | SNP        | CCGAGGTTCTTGTGCTTGAC   | TTGGTGGTTGGAGATGTGCT   |
| FRO8         | SNP        | ATTTCTGCTCGCATCTTCCC   | TGTTTCCTTGCTCAGCCTTC   |
| SDHF2        | SNP        | GGGGTCCGTTTGTTCGTAG    | AACTGGCTGGTCGTCTCATC   |
| NNU_25229-RA | IR and AE  | TCCTCTATGAAAGGGATTGC   | GTGCTGGGTCGTTTGTAAGT   |
| NNU_21858-RA | IR         | CAGGGAGGAGCTAATGTCGT   | ATGTCTCGGATTTTCAGGTGG  |
| NNU_24367-RA | IR         | TGTGCCACTCCGTGCTTATT   | ACCTCTGCCGTCCATTCCTC   |
| NNU_17825-RA | AE         | AGGTGGTGGATGAGAAGTAT   | TGTGGAGTATCGTGGAGTGA   |
| NNU_13286-RA | ES         | TGATGGACCAGTAGGAGGAC   | ATTAGCCAAGATGCTGAAAA   |
